# Supplementary material for: A masked initiation region in retinoblastoma protein regulates its proteasomal degradation
Source: PubMed Central journal article supplement (PMC7181824; doi:10.1038/s41467-020-16003-3), 2020-04-24
Supplement: 41467_2020_16003_MOESM1_ESM.pdf [file 41467_2020_16003_MOESM1_ESM.pdf]

## Supplementary Information

### **A masked initiation region in retinoblastoma protein regulates its proteasomal degradation**

T. Tomita et al.

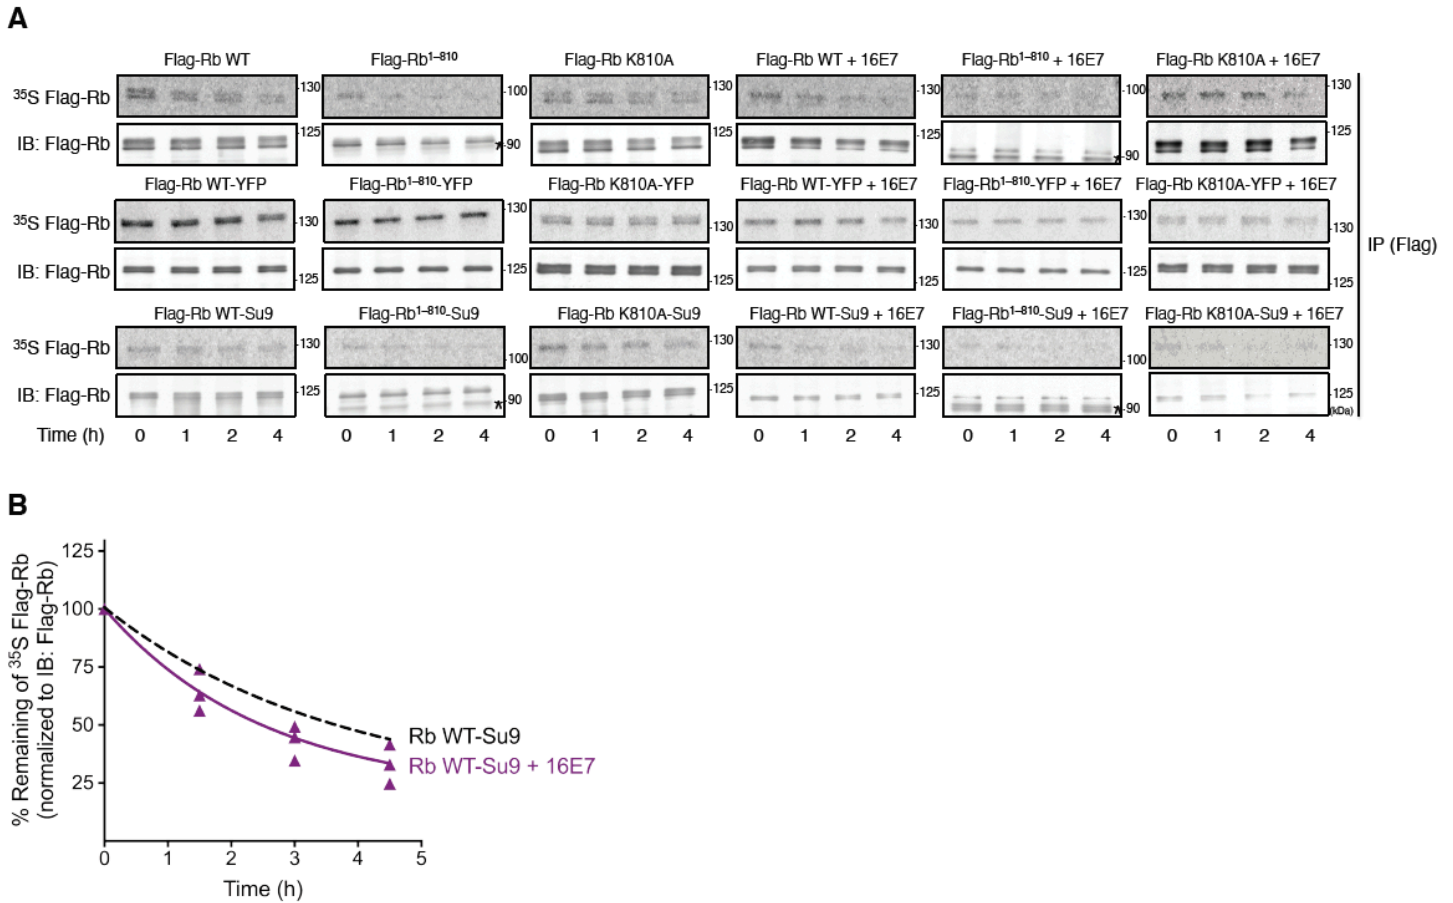

**Supplementary Fig. 1. Metabolic pulse-chase of Rb mutants in HEK293T cells.**

(A) Representative gel images for quantifications shown in Fig. 2 and Supplementary Fig. 1B. The asterisks denote non-specific bands. (B) Metabolic pulse-chase of Rb in cells as in Fig. 2. Effect of 16E7 expression on the degradation rate of Rb WT-Su9 was evaluated. Degradation of Rb-Su9 was replotted with broken line to help with comparison. The graph plots the relative band intensities from three repeat experiments. Source data are provided as a Source Data file.

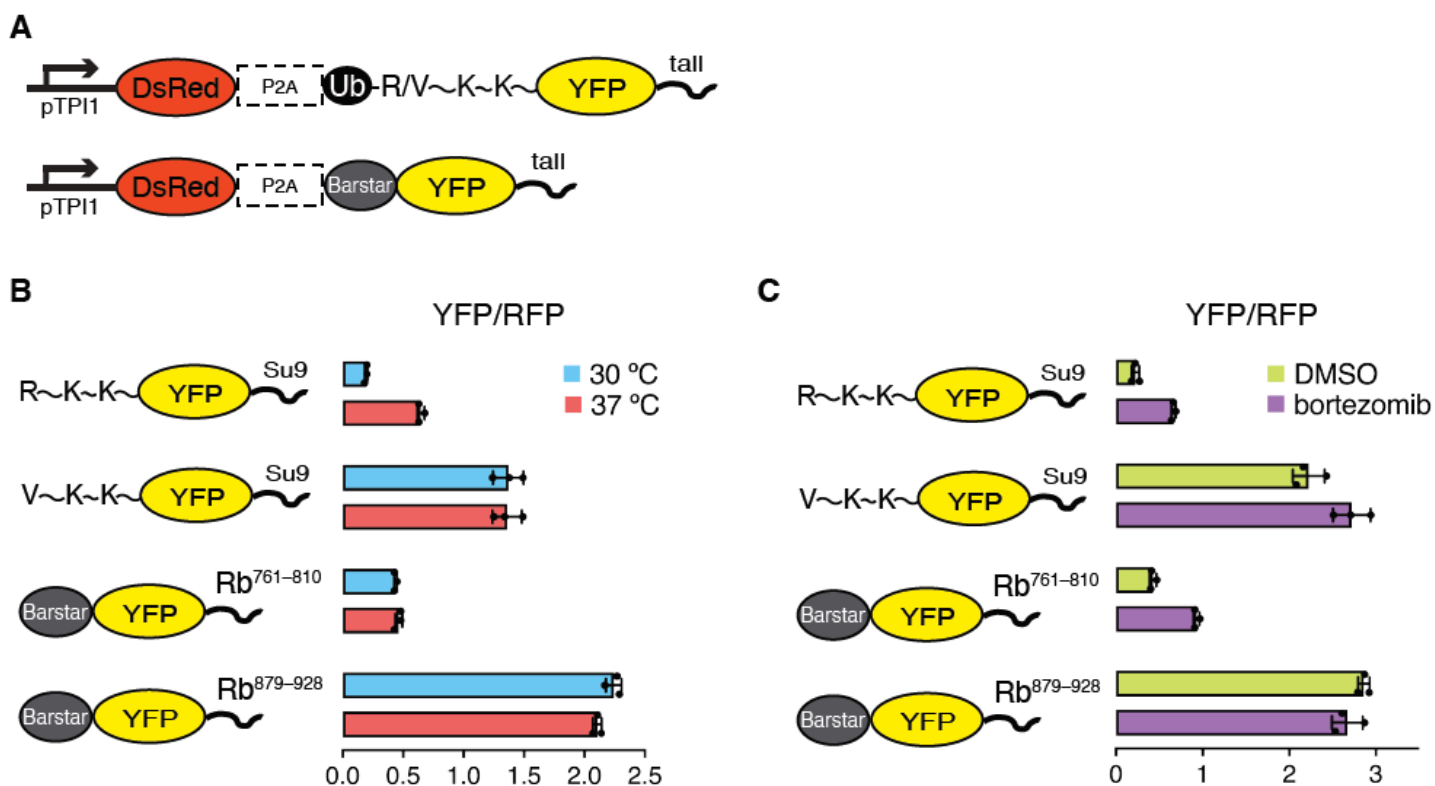

**Supplementary Fig. 2. Initiation at the unmasked Rb tail is effective regardless of ubiquitination.**

(A) Schematic representation of fluorescence-based degradation assay in *S. cerevisiae* as in Fig. 3A. The substrate protein YFP-tail was fused to the C-terminal end of an N-end degron or the *B. amyloliquefaciens* barstar protein. (B) Cell fluorescence profiles of *S. cerevisiae* cultures expressing proteasome substrates with various initiation regions monitored by flow cytometry. The indicated substrates were expressed in the E1 temperature-sensitive strain *uba1-204* at the permissive temperature (30 °C, blue) or the restrictive temperature (37 °C, red). The graph shows relative median cellular YFP fluorescence (median YFP/RFP values)  $\pm$  SD from triplicate experiments. (C) *S. cerevisiae* strain BY4741 carrying *pdr5* $\Delta$  expressing indicated proteasome substrates were treated with DMSO or 50  $\mu$ M bortezomib for 6 h. Cell fluorescence profiles were monitored by flow cytometry. The graph shows relative median cellular YFP fluorescence (median YFP/RFP values)  $\pm$  SD from triplicate experiments. Data are representative of three independent experiments. Source data are provided as a Source Data file.

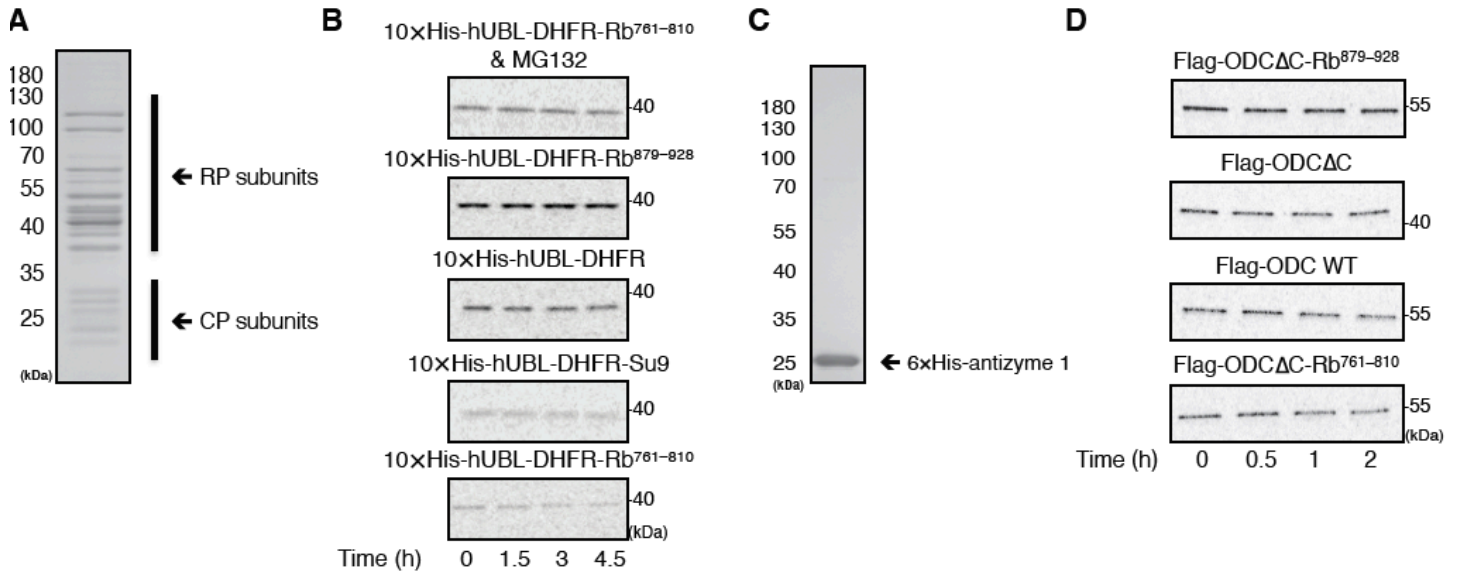

**Supplementary Fig. 3. *In vitro* degradation assay using purified proteasome and antizyme.**

(A) Purified mammalian proteasomes were analyzed by SDS-PAGE, followed by protein staining using InstantBlue. RP and CP denote regulatory particle and core particle, respectively. (B) Representative gel images corresponding to quantifications shown in Fig. 4B. (C) Purified 6xHis-antizyme 1 were analyzed by SDS-PAGE, followed by protein staining using InstantBlue. (D) Representative gel images corresponding to quantifications shown in Fig. 4D. Data are representative of three independent experiments. Source data are provided as a Source Data file.

751                    761                    771                    781                    791                    801                    cleavage site  
 S I I V F Y N S V F M Q R L K T N I L Q Y A S T R P P T L S P I P H I P R S P Y K F P S S P L R I P G G N I Y I S P L **K**

811                    821                    831                    841                    851                    861  
 S P Y K I S **E** G L P T P T K M T P R S R I L V S I G **E** S F G T S **E** K F Q K I N Q M V C N S **D** R V L K R S A **E** G S N P P K

871                    881                    891                    901                    911                    921  
 P L K K L R F **D** I **E** G S **D** E A **D** G S K H L P G **E** S K F Q Q K L A **E** M T S T R T R M Q K Q K M N **D** S M D T S N K **E** E K

**Supplementary Fig. 4. Amino acid sequence of the C-terminal region of Rb.**

The residues from 751 to 928 of Rb are displayed. The calpain cleavage site (Lys 810), negatively charged residues (Asp [D] and Glu [E]), and Rb<sup>879-888</sup> as well as Rb<sup>918-928</sup> are highlighted in blue, red, and grey, respectively.

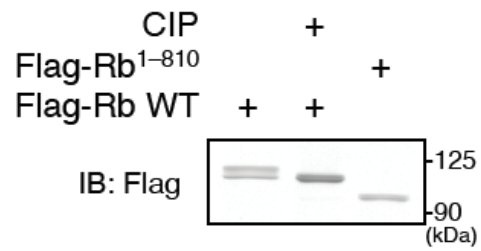

**Supplementary Fig. 5. Rb WT is hyper-phosphorylated in cells.**

HEK293T cells were transfected with Rb WT or Rb<sup>1-810</sup> for 24 h. Cell lysates were treated with 20 U of calf intestinal alkaline phosphatase (CIP) at 37°C for 1 h where indicated. Data is representative of three independent experiments. Source data are provided as a Source Data file.

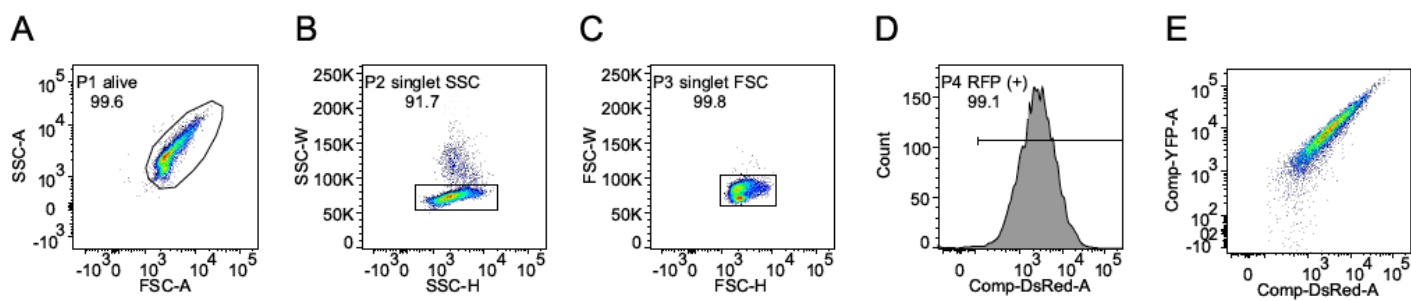

**Supplementary Fig. 6. Gating strategy used for flow cytometry analysis.**

(A–E) Representative scatter plots of flow cytometry analysis of yeast cells expressing RFP and YFP. Cells were gated along FSC-A/SSC-A axes (A) to eliminate dead cells and then gated along SSC-H/SSC-W (B) and FSC-H/FSC-W (C) to eliminate doublets, followed by gating of RFP-positive cells (D) to calculate the median YFP over RFP fluorescence ratios of the final population (E).

| Tail                  | Amino acid sequences                                                  | Charge at pH 7.5 | Theoretical pI | GRAVY (hydrophobicity) |
|-----------------------|-----------------------------------------------------------------------|------------------|----------------|------------------------|
| SP2                   | RSPESMREEYRKEGSPESMREEYRKEGSPESM<br>REEYRKEGSPESMREEYRKEGSPESMREEYRKE | -4.39            | 5.06           | -2.363                 |
| eRR                   | GGGGAWLLPVSLVRRRTTLAPNTQTASPRALADS                                    | 2.61             | 12.00          | -0.127                 |
| Su9                   | MASTRVLASRLASQMAASAKVARPAVRVAQVSKR<br>TIQTGSPLQTRAYSS                 | 7.61             | 12.31          | -0.086                 |
| Rb <sup>729-778</sup> | KDLPHAVQETFKRVLIKEEEYDSIIVFYNSVFMQRL<br>KTNILQYASTRPPT                | 0.72             | 8.31           | -0.416                 |
| Rb <sup>761-810</sup> | MQRLKTNILQYASTRPPTLSPIPHIPRSPYKFPSSP<br>LRIPGGNIYISPLK                | 6.72             | 11.10          | -0.440                 |
| Rb <sup>779-828</sup> | LSPIPHIPRSPYKFPSSPLRIPGGNIYISPLKSPYKI<br>SEGLPTPTKMTPR                | 5.72             | 10.38          | -0.488                 |
| Rb <sup>829-878</sup> | SRILVSIAGESFGTSEKFQKINQMVCNSDRVLKRSA<br>EGSNPPKPLKCLRFD               | 3.78             | 10.01          | -0.656                 |
| Rb <sup>839-888</sup> | FGTSEKFQKINQMVCNSDRVLKRSAEGSNPPKPL<br>KCLRFDIEGSDEADGS                | -0.22            | 8.12           | -0.982                 |
| Rb <sup>849-898</sup> | NQMVCNSDRVLKRSAEGSNPPKPLKCLRFDIEGS<br>DEADGSKHLPGESKFQ                | -0.11            | 8.13           | -1.134                 |
| Rb <sup>859-908</sup> | LKRSAEGSNPPKPLKCLRFDIEGSDEADGSKHLP<br>GESKFQQLAEMTSTR                 | 1.72             | 9.23           | -1.206                 |
| Rb <sup>869-918</sup> | PKPLKCLRFDIEGSDEADGSKHLPGESKFQQLA<br>EMTSTRTRMQQKMND                  | 2.72             | 9.54           | -1.402                 |
| Rb <sup>879-928</sup> | IEGSDEADGSKHLPGESKFQQLAEMTSTRTRM<br>QQQKMNDSMDTSNKEEK                 | -1.28            | 5.74           | -1.596                 |

**Supplementary Table 1. Sequence profiles of initiation regions.**

Amino acid sequences and bioinformatic data of initiation regions used in this study are shown.



| Tail               | Amino acid sequences                                   | Charge at pH 7.5 | Theoretical pI | GRAVY (hydrophobicity) |
|--------------------|--------------------------------------------------------|------------------|----------------|------------------------|
| Rb <sup>1-52</sup> | MPPKTPRKTAATAAAAAAEPAPPPPPPEEDPE<br>QDSGPEDLPLVRLEFEET | -7.38            | 4.13           | -0.967                 |

**Supplementary Table 2. Amino acid composition of the N-terminus of Rb.**

The sequence profile of the N-terminus of Rb is shown as in Supplementary Table 1.

| Name                   | Sequence                                                          | Description                                |
|------------------------|-------------------------------------------------------------------|--------------------------------------------|
| 16E7 BamHI F           | GACTCCTATGGATCCATGCATGGAGATACACCTACATTGCATGAA                     | To amplify HPV 16E7                        |
| 16E7 stop XhoI R       | ATGCATCGCTCGAGTTATGGTTTCTGAGAACAGATGGGGCACAC                      | To amplify HPV 16E7                        |
| Rb BamHI F             | ATAGGATCCATGCCGCCAAAACCCCCGAAAAAC                                 | To amplify Rb                              |
| Rb stop XhoI R         | TATCTCGAGTCAATTTCTTCTTCTTGTGGAGGTATCC                             | To amplify Rb                              |
| Rb aa810 stop XhoI R   | AAACTCGAGTCACTTCAGGGGTGAAATATAGATGTTCCCTCCAG                      | To amplify cleaved Rb                      |
| Rb K810A F             | CTATATTTTACCCCTGGCGAGTCCATATAAAATTCAGAAG                          | To generate K810A mutation of Rb           |
| Rb K810A R             | GAAATTTTATATGGACTCGCCAGGGGTGAAATATAGATGTTCC                       | To generate K810A mutation of Rb           |
| Rb aa928 XhoI linker R | CTGAACCTGACTCGAGTTTCTTCTTCTTGTGGAGGTATCC                          | To amplify Rb-linker to attach YFP         |
| Rb aa810 XhoI linker R | CTGAACCTGACTCGAGTTCAGGGGTGAAATATAGATGTTCC                         | To amplify cleaved Rb-linker to attach YFP |
| Rb SacII Su9 R         | ACGAGTGGAGGCCATCCGCGGTTTCTTCTTCTTGTGGAGGTATCC                     | To attach Su9 tail to Rb                   |
| Rb aa810 SacII Su9 R   | ACGAGTGGAGGCCATCCGCGGTTTCTTCTTCTTGTGGAGGTATCC                     | To attach Su9 tail to cleaved Rb           |
| Su9 F                  | ATGGCCTCCACTCGTGTCTCT                                             | To amplify Su9 tail                        |
| Su9 stop NotI XhoI R   | CTGACTCGAGCGGCCGCTTAGGAAGAGTAGGCGCGGG                             | To amplify Su9 tail                        |
| TPI1 SacI F            | TACATAAACTAAAAGAGCTCATTAAGAGGAG                                   | To amplify insert in CEN plasmid           |
| tail NotI tAHD R       | TTAGAAGTTCTAGAGCGCCGC                                             | To amplify insert in CEN plasmid           |
| Rb aa729 SacII F       | ATACCGCGGAAGGATCTTCTCATGCTGTTCCAGG                                | To amplify tail derived from Rb            |
| Rb aa778 stop XhoI R   | ATACTCGAGTCAAGTAGGGGGCCTGGTGGGAAGCATACT                           | To amplify tail derived from Rb            |
| Rb aa761 SacII F       | ATACCGCGGATGCAGAGACTGAAAACAAATATTTTG                              | To amplify tail derived from Rb            |
| Rb aa779 SacII F       | ATACCGCGGTTGTCCCAATACCTCACATTCCTCG                                | To amplify tail derived from Rb            |
| Rb aa828 stop XhoI R   | ATACTCGAGTCACTTTGGAGTCAATTTTGTGGTG                                | To amplify tail derived from Rb            |
| Rb aa829 SacII F       | ATACCGCGGTCAAGAATCTTAGTATCAATTGGTG                                | To amplify tail derived from Rb            |
| Rb aa878 stop XhoI R   | ATACTCGAGTCAATCAAAGCGTAGTTTTTTCAGTGG                              | To amplify tail derived from Rb            |
| Rb aa839 SacII F       | ATACCGCGGTTCCGGGACTTCTGAGAAGTTCCAG                                | To amplify tail derived from Rb            |
| Rb aa888 stop XhoI R   | ATACTCGAGTCAACTTCCATCTGCTTCATCTGATCC                              | To amplify tail derived from Rb            |
| Rb aa849 SacII F       | ATACCGCGGAATCAGATGGTATGTAACAGCGAC                                 | To amplify tail derived from Rb            |
| Rb aa898 stop XhoI R   | ATACTCGAGTCACTGAAATTTGGACTCTCCTGGGAG                              | To amplify tail derived from Rb            |
| Rb aa859 SacII F       | ATACCGCGGCTCAAAGAAGTCTGAAGGAAGC                                   | To amplify tail derived from Rb            |
| Rb aa908 stop XhoI R   | ATACTCGAGTCACTCGAGTAGAAGTCAATTTCTGCCAG                            | To amplify tail derived from Rb            |
| Rb aa869 SacII F       | ATACCGCGGCCTAAACCACTGAAAAACTACGC                                  | To amplify tail derived from Rb            |
| Rb aa918 stop XhoI R   | ATACTCGAGTCAATCATTTCTTCTGCTTTTGCATTC                              | To amplify tail derived from Rb            |
| Rb aa879 SacII F       | ATACCGCGGATTGAAGGATCAGATGAAGCAGATG                                | To amplify tail derived from Rb            |
| DsRed P2A R            | TCCAGCCTGCTTCCAGCAGGCTGAAGTTAGTAGCTCCGCTTCCCTGG<br>AACAGGTGGTGGCG | To amplify DsRed-P2A                       |
| UBL P2A F              | CTGCTGAAGCAGGCTGGAGACGTGGAGGAGAACCCTGGACCTGTT<br>TCCCTGACGTTCAA   | To amplify P2A-UBL                         |
| P2A R                  | AGGTCCAGGGTTCTCCTCCAC                                             | To amplify P2A                             |
| P2A Ub R               | CACGAAGATCTGCATAGGTCCAGGGTTCTCCTCC                                | To amplify P2A-Ub                          |
| Ub F                   | ATGCAGATCTTCGTGAAGACTTTG                                          | To amplify Ub                              |
| P2A Barstar F          | GTGGAGGAGAACCCTGGACCTAAAAAAGCAGTCATTAACGGGGAAC<br>AAATCAGAAG      | To amplify P2A-Barstar                     |
| linker R               | GGATCCACCGCCCGAAC                                                 | To amplify UBL-linker                      |
| linker F               | GTCGACGGTGGTTCGGGC                                                | To amplify linker-YFP                      |
| sYFP SacII R           | GATAACCGCGGCTTGTACAGCTCGTCCATGC                                   | To amplify YFP                             |
| 10xHis-DHFR F          | ATATACATATCGGGGTTCTCATCATCATCATCATCATCATCATCA<br>TGGTATTAG        | To amplify 10xHis-DHFR                     |
| DHFR SacII R           | GATAACCGCGGGCGGCGTTCAGAATTTCC                                     | To attach tail to DHFR                     |
| DHFR stop SacII R      | GATAACCGCGGTTAGCGGCGTTCAGAATTTCC                                  | To amplify 10xHis-DHFR without tail        |
| ODC BamHI F            | ATAGGATCCATGAACAACCTTTGGTAATGAAGAGTTTG                            | To amplify ODC                             |
| ODC stop XhoI R        | ATACTCGAGTACACATTAATACTAGCCGAAGCACAG                              | To amplify ODC                             |
| ODCAC stop XhoI R      | ATACTCGAGTACTCGGGGTTCTGGAATTGCTGCATG                              | To amplify ODC without tail                |
| ODCAC SacII R          | ATACCGCGGGTCCGGGTTCTGGAATTGCTGCATG                                | To replace the tail of ODC                 |
| AZ1 EcoRI F            | ATAGAATTCATGGTAAAATCCTCCCTGCAGCGGATCC                             | To amplify antizyme-1                      |
| AZ1 stop XhoI R        | ATACTCGAGTACTCCTCCTCCTCCTCCCGAAGACTC                              | To amplify antizyme-1                      |

### Supplementary Table 3. Primers used in the study.

Primer sequences are given from the 5'-end to the 3'-end. "F" indicates the forward primer and "R" indicates the reverse primer.
